# Supplementary material for: Adhesion reformation and the limited translational value of experiments with adhesion barriers: A systematic review and meta-analysis of animal models
Source: PubMed Central journal article supplement (PMC6890766; doi:10.1038/s41598-019-52457-2), 2019-12-03

## Supplementary appendix

### **Adhesion reformation and the limited translational value of experiments with adhesion barriers: A systematic review and meta-analysis of animal models**

Chema Strik, M.D., Kimberley E. Wever PhD, Martijn W.J. Stommel, M.D., PhD, Harry van Goor, M.D., PhD, FRCS, Richard P.G. ten Broek, M.D., PhD

## **Table of contents**

**Table S1.** Full Search Strategy

**Table S2.** Subgroup analysis using meta-regression for assessing the impact of experimental factors on the incidence of adhesions,.

**Table S3.** Subgroup analysis for the adhesion score

**Figure S1.** Pooled analysis of the efficacy of the different adhesion barriers in preventing adhesion reformation

**Figure S2.** Pooled analysis of the efficacy of adhesion barriers in reducing the score of adhesion reformation

**Figure S3.** Forest plot showing the efficacy of laparoscopic versus open adhesiolysis in reducing the adhesion score of reformed adhesions

**Table S1. Full Search Strategy**

**Disease of interest:**

**Adhesions:**

("Tissue Adhesions"[Mesh] OR "Tissue adhesions" [Tiab] OR "Tissue Adhesion" [tiab] OR "Surgical Adhesions" [tiab] OR "Surgical adhesion" [tiab])

**COMBINE WITH AND**

**Peritoneum:**

("Peritoneum"[Mesh] OR "peritoneum" [tiab] OR "Mesentery"[Mesh] OR "Peritoneum, Visceral" [tiab] OR "Visceral Peritoneum" [tiab] OR "Peritoneum, Parietal" [tiab] OR "Parietal Peritoneum" [tiab] OR "Cavity, Peritoneal" [tiab] OR "Abdomen"[Mesh] OR "abdomen" [tiab] OR "abdomens" [tiab] OR "Abdominal Cavity"[Mesh] OR "Abdominal Cavities" [tiab] OR "Cavities, Abdominal" [tiab] OR "Cavity, Abdominal" [tiab] OR "Cavitas abdominis" [tiab] OR "intra-abdominal" [tiab] OR "intraabdominal" [tiab] OR "intraperitoneally" [tiab] OR "intraperitoneally" [tiab]))

**COMBINE WITH OR**

**Combined terms for peritoneal adhesions:**

("peritoneal adhesion" [tiab] OR "peritoneal adhesions" [tiab] OR "abdominal adhesion" [tiab] OR "abdominal adhesions" [tiab] OR "intra-abdominal adhesion" [tiab] OR "intra-abdominal adhesions" [tiab] OR "intraabdominal adhesion" [tiab] OR "intraabdominal adhesions" [tiab])

**COMBINE WITH AND**

**Intervention:**

"Seprafilm" [tiab] "Sepracoat" [tiab] OR "INTERCEED" [tiab] OR "RepelCV" [tiab] OR "Gore-tex surgical membrane" [tiab] OR "Gore tex surgical membrane" [tiab] OR "Polytetrafluoroethylene"[Mesh] OR "GORE-TEX" [tiab] OR "GORE TEX" [tiab] OR "Goretex" [tiab] OR "Prevadh" [tiab] OR "SuperSeal" [tiab] OR "Oxidized regenerated cellulose" [tiab] OR "cellulose" [tiab] OR "tc7" [tiab] OR "cellulose" [tiab] OR "Hyaluronate carboxymethylcellulose" [tiab] OR "carboxymethylcellulose" [tiab] OR "hyaluronan" [tiab] OR "hyaluron" [tiab] OR "hyaluronic acid" [tiab] OR "Adcon-P" [tiab] OR "Adept" [tiab] OR "Icodial" [tiab] OR "Baxter Brand of Icodextrin" [tiab] OR "Extraneal" [tiab] OR "icodextrin" [tiab] OR "Sepracoat" [tiab] OR "Seprafilm" [tiab] OR "Tisseel" [tiab] OR "Fibrin Tissue Adhesive" [Mesh] OR "Fibrin Adhesive" [tiab] OR "Fibrin Glue" [tiab] OR "Fibrinogen Adhesive" [tiab] OR "Fibrin Sealant System" [tiab] OR "Crosseal" [tiab] OR "Fibrin Klebe System Immuno" [tiab] OR "Transglutine" [tiab] OR "Fibrin Sealant" [tiab] OR "Tissel" [tiab] OR "Tissucol" [tiab] OR "Beriplast" [tiab] OR "Fibrin Seal" [tiab] OR "Sprayshield" [tiab] OR "Spraygel" [tiab] OR "PEG" [tiab] OR "polyethylene glycol" [tiab] OR "Intercoat" [tiab] OR "intergel" [tiab] OR "Sepraspray" [tiab] OR "crystalloid solutions" [tiab] OR "Ringer's lactate" [tiab] OR "Isotonic Solutions"[Mesh] OR "Sodium Chloride"[Mesh] OR "Sodium Chloride" [tiab] OR "NaCl" [tiab] OR "Saline Solution" [tiab] OR "adhesiolysis" [tiab]

**COMBINE WITH AND**

**Domain Animals:**

**Animal search filter as published by SYRCLE\***

\* Hooijmans, C.R., et al., *Enhancing search efficiency by means of a search filter for finding all studies on animal experimentation in PubMed*. Lab Anim, 2010. **44**(3): p. 170-5.

**Table S2. Subgroup analysis using meta-regression for assessing the impact of experimental factors on the incidence of adhesions**

| Subgroup                          | Number of studies | Effect size | 95% confidence interval |       | Heterogeneity           |      |
|-----------------------------------|-------------------|-------------|-------------------------|-------|-------------------------|------|
|                                   |                   |             | lower                   | upper | I <sup>2</sup> residual | p    |
| <b>Experimental model</b>         |                   |             |                         |       |                         |      |
| Cecal abrasion‡                   | 31                | 0.80        | 0.73                    | 0.87  |                         |      |
| Uterine horn                      | 7                 | 0.90        | 0.69                    | 1.12  |                         |      |
| Other*                            | 3                 |             |                         |       |                         |      |
| Between subgroup                  |                   |             |                         |       | 0.00                    | 0.41 |
| <b>Animal species</b>             |                   |             |                         |       |                         |      |
| Rabbit                            | 19                | 0.67        | 0.55                    | 0.80  |                         |      |
| Rat                               | 16                | 0.88        | 0.80                    | 0.97  |                         |      |
| Other*‡                           | 6                 |             |                         |       |                         |      |
| Between subgroup                  |                   |             |                         |       | 0.00                    | 0.05 |
| <b>Sex</b>                        |                   |             |                         |       |                         |      |
| Female‡                           | 17                | 0.79        | 0.66                    | 0.92  |                         |      |
| Male                              | 8                 | 0.85        | 0.75                    | 0.94  |                         |      |
| Mixed*                            | 3                 |             |                         |       |                         |      |
| NS                                | 13                |             |                         |       |                         |      |
| Between subgroup                  |                   |             |                         |       | 0.00                    | 0.21 |
| <b>Repeated peritoneal injury</b> |                   |             |                         |       |                         |      |
| No‡                               | 36                | 0.84        | 0.78                    | 0.91  |                         |      |
| Yes                               | 5                 | 0.62        | 0.37                    | 0.86  |                         |      |
| Between subgroups                 |                   |             |                         |       | 0.00                    | 0.09 |

*NS not specified, ‡ reference category, \*not performed due to the low number of studies with this study characteristic*

**Table S3. Subgroup analysis for the adhesion score**

| Subgroup                               | Number of studies | Effect size | 95% confidence interval |       | Heterogeneity           |      |
|----------------------------------------|-------------------|-------------|-------------------------|-------|-------------------------|------|
|                                        |                   |             | lower                   | upper | I <sup>2</sup> residual | p    |
| <b>Experimental model</b>              |                   |             |                         |       |                         |      |
| Cecal abrasion                         | 25                | 1.66        | 1.24                    | 2.08  |                         |      |
| Uterine horn‡                          | 19                | 2.01        | 1.51                    | 2.51  |                         |      |
| Other*                                 | 2                 |             |                         |       |                         |      |
| Between subgroup                       |                   |             |                         |       | 70.43                   | 0.45 |
| <b>Animal species</b>                  |                   |             |                         |       |                         |      |
| Rabbit                                 | 25                | 1.87        | 1.44                    | 2.31  |                         |      |
| Rat                                    | 15                | 1.99        | 1.42                    | 2.56  |                         |      |
| Other*‡                                | 6                 |             |                         |       |                         |      |
| Between subgroup                       |                   |             |                         |       | 68.09                   | 0.56 |
| <b>Sex</b>                             |                   |             |                         |       |                         |      |
| Female‡                                | 29                | 2.05        | 1.68                    | 2.42  |                         |      |
| Male                                   | 6                 | 1.15        | 0.40                    | 1.91  |                         |      |
| Mixed*                                 | 3                 |             |                         |       |                         |      |
| NS*                                    | 8                 |             |                         |       |                         |      |
| Between subgroup                       |                   |             |                         |       | 63.46                   | 0.03 |
| <b>Repeated peritoneal injury</b>      |                   |             |                         |       |                         |      |
| No‡                                    | 38                | 1.81        | 1.47                    | 2.16  |                         |      |
| Yes                                    | 8                 | 1.91        | 1.10                    | 2.71  |                         |      |
| Between subgroups                      |                   |             |                         |       | 70.48                   | 0.84 |
| <b>Time between surgery</b>            |                   |             |                         |       |                         |      |
| 7 days                                 | 12                | 2.21        | 1.58                    | 2.83  |                         |      |
| 14 days                                | 17                | 1.53        | 1.03                    | 2.03  |                         |      |
| 21 days                                | 6                 | 2.02        | 1.20                    | 2.84  |                         |      |
| Other*‡                                | 11                |             |                         |       |                         |      |
| Between subgroups                      |                   |             |                         |       | 67.16                   | 0.30 |
| <b>Method adhesiolysis</b>             |                   |             |                         |       |                         |      |
| Blunt and sharp                        | 20                | 1.77        | 1.28                    | 2.27  |                         |      |
| Coagulation                            | 7                 | 1.87        | 1.02                    | 2.72  |                         |      |
| NS*                                    | 19                |             |                         |       |                         |      |
| Between subgroups                      |                   |             |                         |       | 70.22                   | 0.96 |
| <b>Type of adhesion scoring system</b> |                   |             |                         |       |                         |      |
| Tenacity‡                              | 10                | 1.40        | 0.76                    | 2.05  |                         |      |
| Extent                                 | 16                | 2.15        | 1.63                    | 2.67  |                         |      |
| Combination                            | 18                | 1.63        | 1.16                    | 2.10  |                         |      |
| Other*                                 | 2                 |             |                         |       |                         |      |
| Between subgroups                      |                   |             |                         |       | 65.04                   | 0.09 |

*NS not specified, ‡ reference category, \*not performed due to the low number of studies with this study characteristic or because subgroup is not specified*

**Figure S1. Pooled analysis of the efficacy of the different adhesion barriers in preventing adhesion reformation**

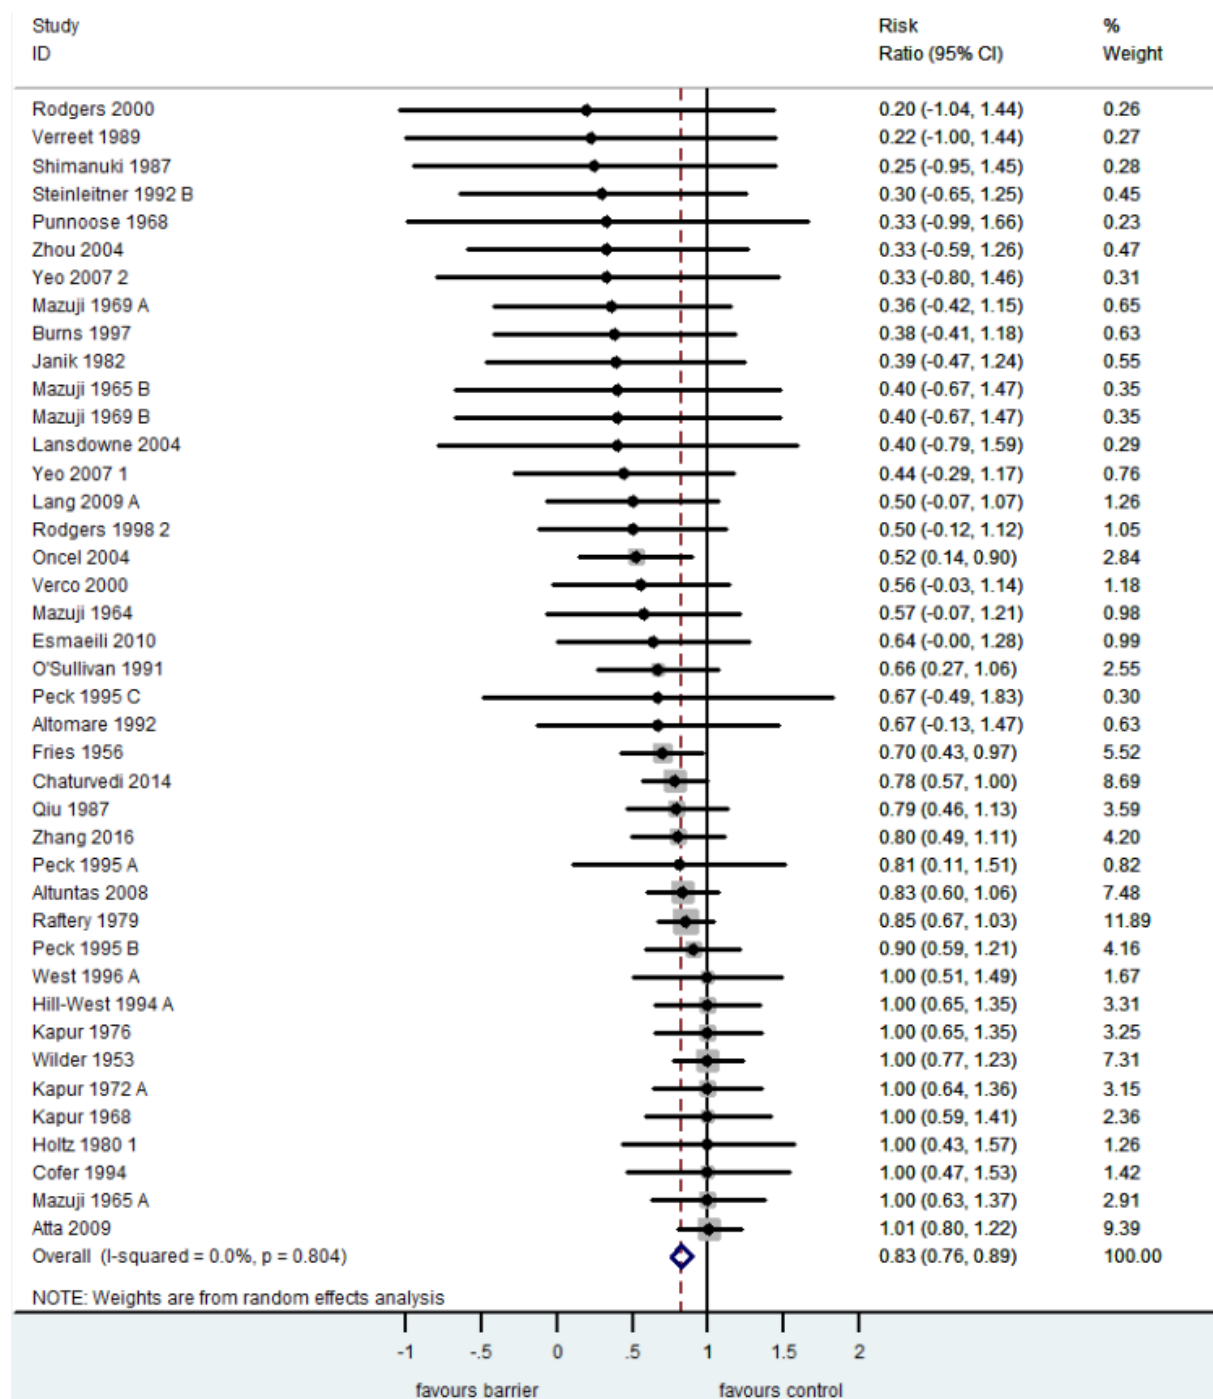

Figure S 2 Pooled analysis of the efficacy of adhesion barriers in reducing the score of adhesion reformation

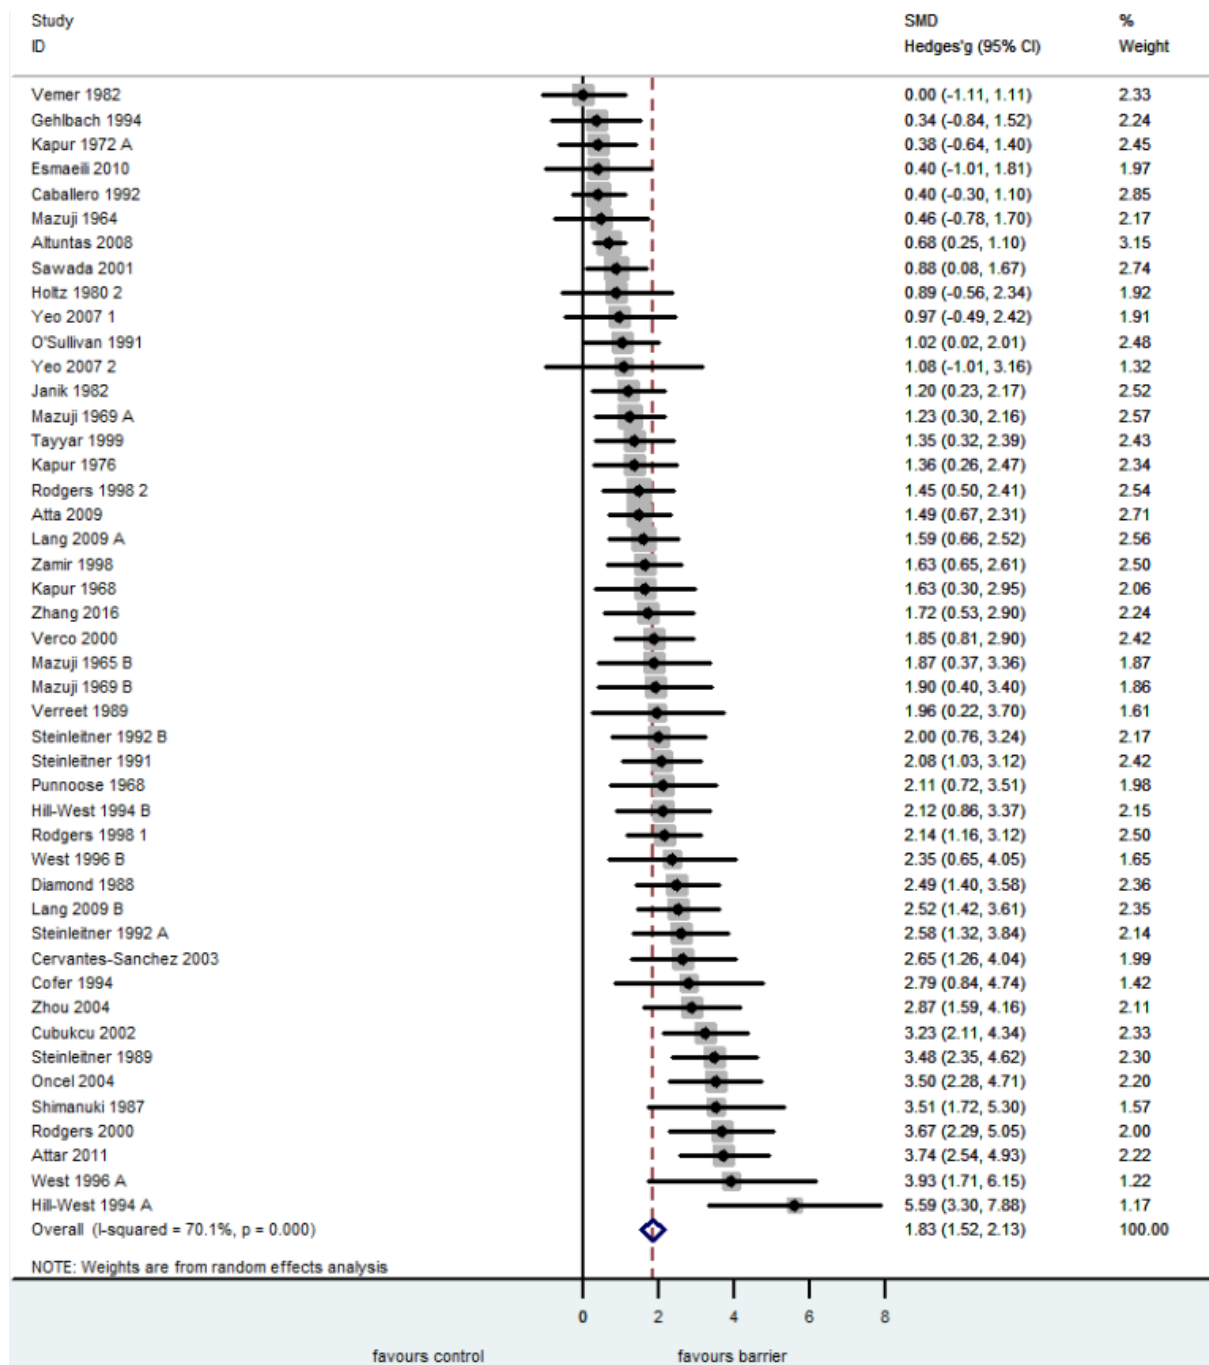

**Figure S3. Forest plot showing the efficacy of laparoscopic versus open adhesiolysis in reducing the adhesion score of reformed adhesions**

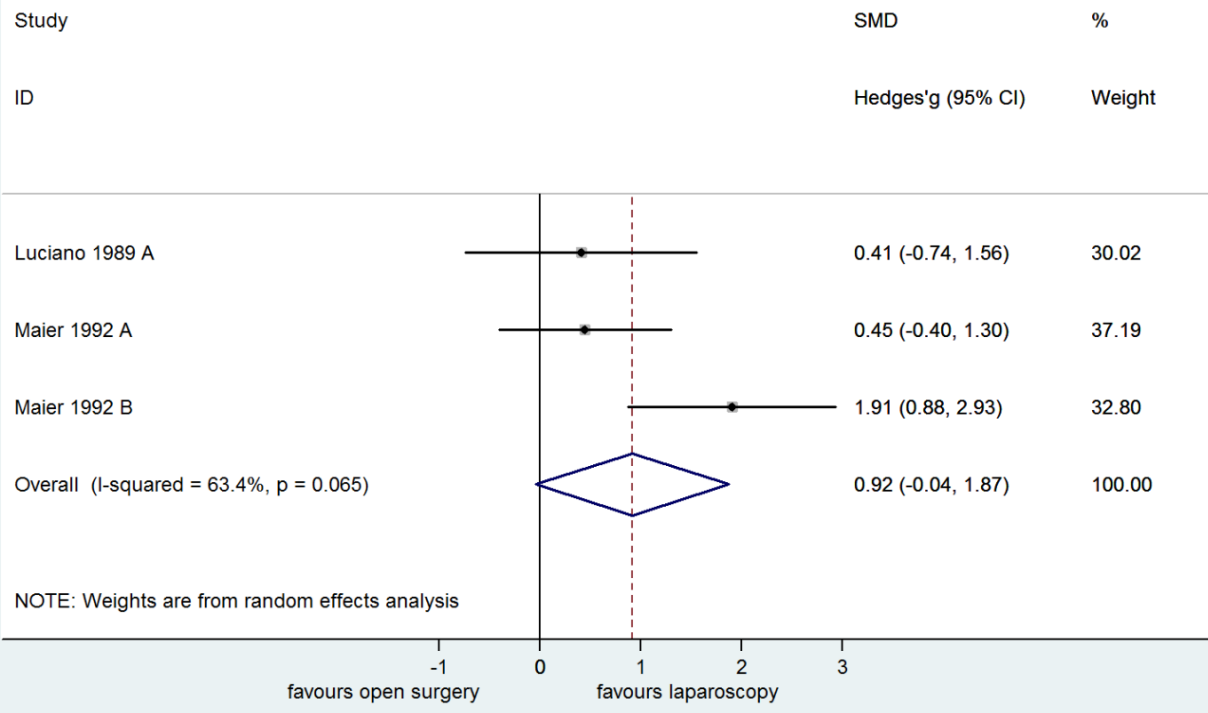

Supplement: 41598_2019_52457_MOESM1_ESM.pdf [file 41598_2019_52457_MOESM1_ESM.pdf]
